# Supplementary material for: Prenatal hypoxia-induced epigenomic and transcriptomic reprogramming in rat fetal and adult offspring hearts
Source: PubMed Central journal article supplement (PMC6820751; doi:10.1038/s41597-019-0253-9), 2019-10-29
Supplement: 41597_2019_253_MOESM1_ESM.pdf [file 41597_2019_253_MOESM1_ESM.pdf]

Supplementary Table 1. Statistics Summary of raw, trimmed, aligned reads and CpGs coverage of RRBS data

| Sample  | Tissue | Raw reads  | Reads after trimming | Aligned reads | Aligned perct | CpGs with > 10 coverage | Overlapping CpGs | CpG regions with > 20 coverage | Overlapping CpG regions |
|---------|--------|------------|----------------------|---------------|---------------|-------------------------|------------------|--------------------------------|-------------------------|
| C1_6    | Heart  | 26,695,840 | 26,072,950           | 18,650,283    | 69.86%        | 973,090                 |                  | 231,354                        |                         |
| C2_11   | Heart  | 40,972,629 | 40,226,777           | 28,800,878    | 70.29%        | 1,242,160               |                  | 244,819                        |                         |
| C3_6    | Heart  | 25,062,167 | 24,535,588           | 17,498,561    | 69.82%        | 972,292                 | 590,422          | 230,393                        | 196,513                 |
| H3_1    | Heart  | 37,561,432 | 36,775,870           | 26,769,528    | 71.27%        | 1,194,791               |                  | 239,878                        |                         |
| H3_2    | Heart  | 25,559,679 | 25,089,677           | 18,294,745    | 71.58%        | 1,023,597               |                  | 232,377                        |                         |
| H5_3    | Heart  | 23,394,623 | 22,889,181           | 16,601,333    | 70.96%        | 952,553                 |                  | 223,142                        |                         |
| C1      | Heart  | 17,135,032 | 16,547,962           | 11,768,295    | 68.68%        | 884,322                 |                  | 203,101                        |                         |
| C2      | Heart  | 24,241,632 | 22,878,966           | 16,140,595    | 66.58%        | 1,092,544               |                  | 211,651                        |                         |
| C3      | Heart  | 27,852,951 | 26,808,469           | 17,960,090    | 64.48%        | 1,126,651               |                  | 222,460                        |                         |
| C4      | Heart  | 20,749,563 | 19,790,419           | 14,118,473    | 68.04%        | 1,011,999               |                  | 212,544                        |                         |
| C5      | Heart  | 20,952,710 | 20,083,927           | 14,113,801    | 67.36%        | 1,007,384               |                  | 212,444                        |                         |
| C6      | Heart  | 14,990,291 | 14,371,737           | 9,900,370     | 66.05%        | 725,525                 | 454,882          | 198,606                        | 176,402                 |
| H1      | Heart  | 25,712,725 | 24,632,094           | 17,627,567    | 68.56%        | 1,119,762               |                  | 229,018                        |                         |
| H2      | Heart  | 22,462,655 | 21,585,728           | 15,623,008    | 69.55%        | 1,071,396               |                  | 217,772                        |                         |
| H3      | Heart  | 23,291,226 | 22,413,728           | 16,050,808    | 68.91%        | 1,071,479               |                  | 218,135                        |                         |
| H4      | Heart  | 21,582,884 | 20,780,342           | 14,874,035    | 68.92%        | 1,028,367               |                  | 212,191                        |                         |
| H5      | Heart  | 26,982,687 | 25,777,219           | 18,327,452    | 67.92%        | 1,164,827               |                  | 222,064                        |                         |
| H6      | Heart  | 23,910,340 | 23,121,304           | 16,521,401    | 69.10%        | 1,090,146               |                  | 219,834                        |                         |
| Average |        | 24,950,615 | 24,132,330           | 17,202,290    | 68.77%        | 1,041,827               |                  | 221,210                        |                         |
