# Supplementary material for: Prenatal hypoxia-induced epigenomic and transcriptomic reprogramming in rat fetal and adult offspring hearts
Source: PubMed Central journal article supplement (PMC6820751; doi:10.1038/s41597-019-0253-9), 2019-10-29
Supplement: 41597_2019_253_MOESM2_ESM.pdf [file 41597_2019_253_MOESM2_ESM.pdf]

**Supplementary Table 2. Statistics Summary of raw, trimmed, aligned reads of RNA-Seq data and ERCC spike-in**

| Sample | Status  | Gender | Tissue | Raw reads  | Total left reads | Aligned left reads | Total right reads | Aligned right reads | Total aligned pair-reads | ERCC aligned pair-reads | Total aligned reads | Overall alignment rate | ERCC alignment rate | PE   |
|--------|---------|--------|--------|------------|------------------|--------------------|-------------------|---------------------|--------------------------|-------------------------|---------------------|------------------------|---------------------|------|
| C1-6   | Control | Fetal  | Heart  | 34,895,230 | 15,163,134       | 13,769,068         | 15,163,134        | 13,449,185          | 12,632,742               | 24,415                  | 27,218,253          | 89.75%                 | 0.16%               | 75X2 |
| C2-11  | Control | Fetal  | Heart  | 38,601,636 | 16,940,751       | 15,331,154         | 16,940,751        | 15,018,240          | 14,075,483               | 26,132                  | 30,349,394          | 89.58%                 | 0.15%               | 75X2 |
| C3-6   | Control | Fetal  | Heart  | 42,102,084 | 17,800,708       | 16,072,424         | 17,800,708        | 15,613,963          | 14,642,669               | 26,028                  | 31,686,387          | 89.00%                 | 0.15%               | 75X2 |
| H3-1   | Hypoxia | Fetal  | Heart  | 38,231,532 | 16,311,619       | 14,617,320         | 16,311,619        | 14,286,925          | 13,323,978               | 26,657                  | 28,904,245          | 88.60%                 | 0.16%               | 75X2 |
| H3-2   | Hypoxia | Fetal  | Heart  | 36,522,906 | 15,711,724       | 14,257,256         | 15,711,724        | 13,804,763          | 12,971,552               | 22,875                  | 28,062,019          | 89.30%                 | 0.15%               | 75X2 |
| H5-3   | Hypoxia | Fetal  | Heart  | 36,385,396 | 15,575,172       | 14,041,426         | 15,575,172        | 13,675,676          | 12,801,716               | 22,879                  | 27,717,102          | 88.98%                 | 0.15%               | 75X2 |
| MC3    | Control | Male   | Heart  | 58,185,428 | 27,146,977       | 26,172,144         | 27,146,977        | 25,012,103          | 24,465,642               | 80,423                  | 51,184,247          | 94.27%                 | 0.30%               | 75X2 |
| MC4    | Control | Male   | Heart  | 56,634,526 | 26,508,245       | 25,528,656         | 26,508,245        | 24,523,356          | 23,980,726               | 88,808                  | 50,052,012          | 94.41%                 | 0.34%               | 75X2 |
| MC7    | Control | Male   | Heart  | 54,916,406 | 25,886,059       | 24,877,868         | 25,886,059        | 23,949,445          | 23,386,792               | 87,580                  | 48,827,313          | 94.31%                 | 0.34%               | 75X2 |
| MC8    | Control | Male   | Heart  | 56,003,054 | 26,287,945       | 25,173,210         | 26,287,945        | 24,275,411          | 23,652,439               | 81,751                  | 49,448,621          | 94.05%                 | 0.31%               | 75X2 |
| MC9    | Control | Male   | Heart  | 58,968,558 | 27,655,885       | 26,052,099         | 27,655,885        | 25,289,436          | 24,446,787               | 67,829                  | 51,341,535          | 92.82%                 | 0.25%               | 75X2 |
| MH1    | Hypoxia | Male   | Heart  | 55,039,114 | 25,775,880       | 24,831,468         | 25,775,880        | 23,901,996          | 23,358,079               | 77,021                  | 48,733,464          | 94.53%                 | 0.30%               | 75X2 |
| MH2    | Hypoxia | Male   | Heart  | 47,634,206 | 22,316,457       | 21,383,592         | 22,316,457        | 20,565,900          | 20,049,445               | 79,958                  | 41,949,492          | 93.99%                 | 0.36%               | 75X2 |
| MH4    | Hypoxia | Male   | Heart  | 54,297,082 | 25,500,117       | 24,524,929         | 25,500,117        | 23,690,788          | 23,164,253               | 97,318                  | 48,215,717          | 94.54%                 | 0.38%               | 75X2 |
| MH9    | Hypoxia | Male   | Heart  | 54,888,454 | 25,830,422       | 24,377,736         | 25,830,422        | 23,746,863          | 22,979,753               | 79,612                  | 48,124,599          | 93.15%                 | 0.31%               | 75X2 |
| MH10   | Hypoxia | Male   | Heart  | 53,089,986 | 24,844,176       | 23,757,890         | 24,844,176        | 22,880,421          | 22,312,129               | 101,802                 | 46,638,311          | 93.86%                 | 0.41%               | 75X2 |
| FC3    | Control | Female | Heart  | 53,455,590 | 24,919,293       | 23,962,328         | 24,919,293        | 23,013,270          | 22,544,086               | 112,624                 | 46,975,598          | 94.26%                 | 0.45%               | 75X2 |
| FC4    | Control | Female | Heart  | 53,071,534 | 24,887,935       | 23,938,056         | 24,887,935        | 23,066,979          | 22,567,301               | 119,016                 | 47,005,035          | 94.43%                 | 0.48%               | 75X2 |
| FC5    | Control | Female | Heart  | 53,203,616 | 24,891,294       | 24,019,361         | 24,891,294        | 22,998,780          | 22,530,308               | 95,103                  | 47,018,141          | 94.45%                 | 0.38%               | 75X2 |
| FC6    | Control | Female | Heart  | 48,201,600 | 22,630,312       | 21,745,871         | 22,630,312        | 20,955,932          | 20,484,946               | 80,985                  | 42,701,803          | 94.35%                 | 0.36%               | 75X2 |
| FC7    | Control | Female | Heart  | 55,741,566 | 26,060,937       | 25,041,431         | 26,060,937        | 24,048,345          | 23,514,484               | 102,117                 | 49,089,776          | 94.18%                 | 0.39%               | 75X2 |
| FH3    | Hypoxia | Female | Heart  | 52,662,140 | 24,638,573       | 23,666,762         | 24,638,573        | 22,722,741          | 22,200,329               | 99,233                  | 46,389,503          | 94.14%                 | 0.40%               | 75X2 |
| FH4    | Hypoxia | Female | Heart  | 54,616,484 | 25,471,144       | 23,917,729         | 25,471,144        | 22,973,636          | 22,476,673               | 130,593                 | 46,891,365          | 92.05%                 | 0.51%               | 75X2 |
| FH6    | Hypoxia | Female | Heart  | 53,757,798 | 25,197,459       | 24,160,510         | 25,197,459        | 23,261,378          | 22,737,527               | 97,404                  | 47,421,888          | 94.10%                 | 0.39%               | 75X2 |
| FH7    | Hypoxia | Female | Heart  | 52,364,530 | 24,467,653       | 23,464,740         | 24,467,653        | 22,444,107          | 21,929,771               | 81,867                  | 45,908,847          | 93.82%                 | 0.33%               | 75X2 |
| FH9    | Hypoxia | Female | Heart  | 55,678,614 | 26,017,403       | 25,021,310         | 26,017,403        | 24,081,985          | 23,550,297               | 100,505                 | 49,103,295          | 94.37%                 | 0.39%               | 75X2 |
